# Supplementary material for: Microstructural asymmetry in the human cortex
Source: PubMed Central journal article supplement (PMC11584796; doi:10.1038/s41467-024-54243-9), 2024-11-22
Supplement: 41467_2024_54243_MOESM1_ESM.pdf [file 41467_2024_54243_MOESM1_ESM.pdf]

## Supplementary Materials for “Microstructural asymmetry in the human cortex”

Bin Wan <sup>1,2,3,4</sup>, Amin Saberi <sup>1,4,5</sup>, Casey Paquola <sup>4</sup>, H. Lina Schaare <sup>1,4</sup>, Meike D. Hettwer <sup>1,4,5,6</sup>,  
Jessica Royer <sup>7</sup>, Alexandra John <sup>1,4</sup>, Lena Dorfschmidt <sup>8,9</sup>, Şeyma Bayrak <sup>1,3,4</sup>, Richard A.I.  
Bethlehem <sup>10</sup>, Simon B. Eickhoff <sup>4,5</sup>, Boris C. Bernhardt <sup>7</sup>, Sofie L. Valk <sup>1,4,5</sup>

1. *Otto Hahn Research Group Cognitive Neurogenetics, Max Planck Institute for Human Cognitive and Brain Sciences, Leipzig, Germany.*
2. *International Max Planck Research School on Neuroscience of Communication: Function, Structure, and Plasticity (IMPRS NeuroCom), Leipzig, Germany.*
3. *Department of Cognitive Neurology, University Hospital Leipzig and Faculty of Medicine, University of Leipzig, Leipzig, Germany.*
4. *Institute of Neuroscience and Medicine (INM-7: Brain and Behavior), Research Center Jülich, Jülich, Germany.*
5. *Institute of Systems Neuroscience, Medical Faculty and University Hospital Düsseldorf, Heinrich Heine University Düsseldorf, Düsseldorf, Germany.*
6. *Max Planck School of Cognition, Leipzig, Germany*
7. *McConnell Brain Imaging Centre, Montréal Neurological Institute and Hospital, McGill University, Montréal, QC, Canada.*
8. *Department of Child and Adolescent Psychiatry and Behavioral Science, The Children’s Hospital of Philadelphia, Philadelphia, PA, USA.*
9. *Lifespan Brain Institute, The Children’s Hospital of Philadelphia and Penn Medicine, Philadelphia, PA, USA.*
10. *Department of Psychology, University of Cambridge, Cambridge, UK.*

### Supplementary Materials

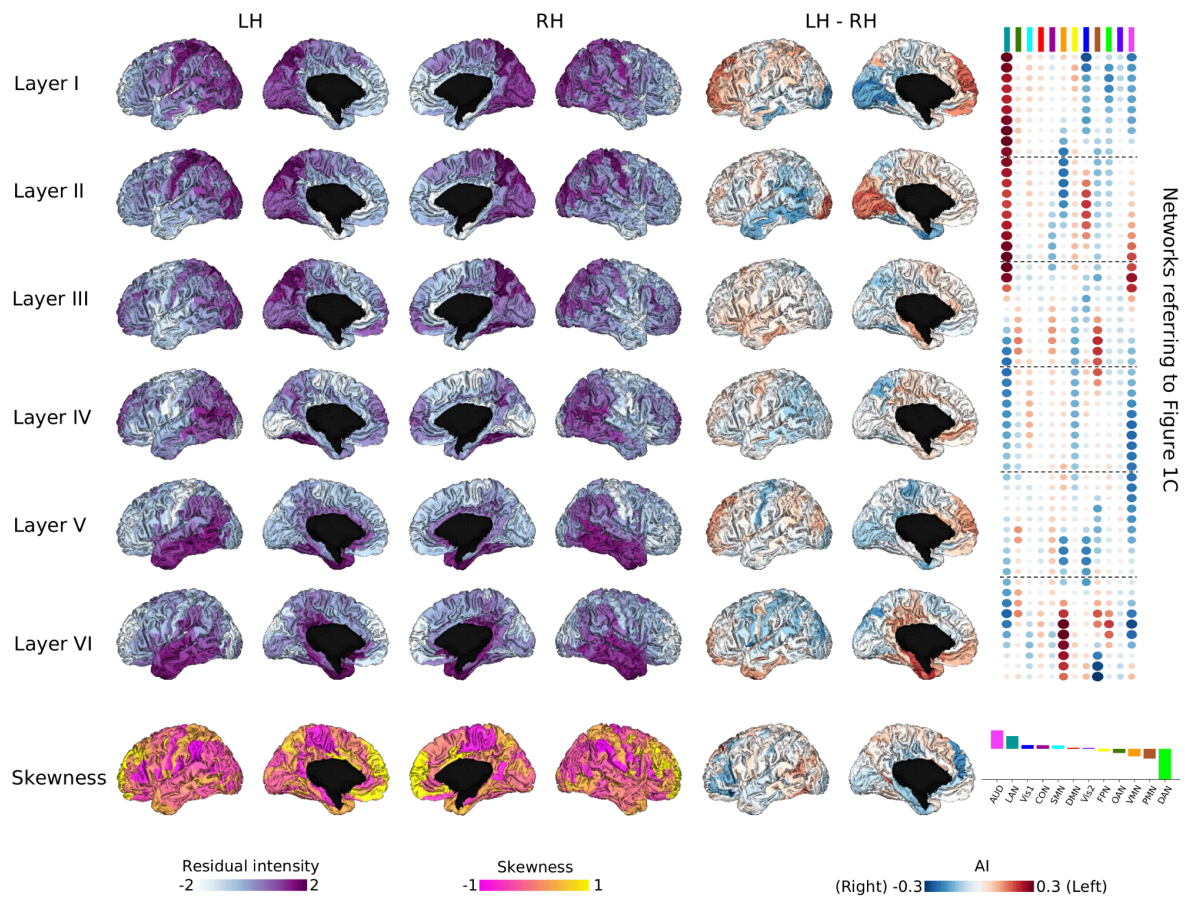

**Supplementary Figure S1.** Residual intensity values for each layer in BigBrain ( $N = 1$ ).

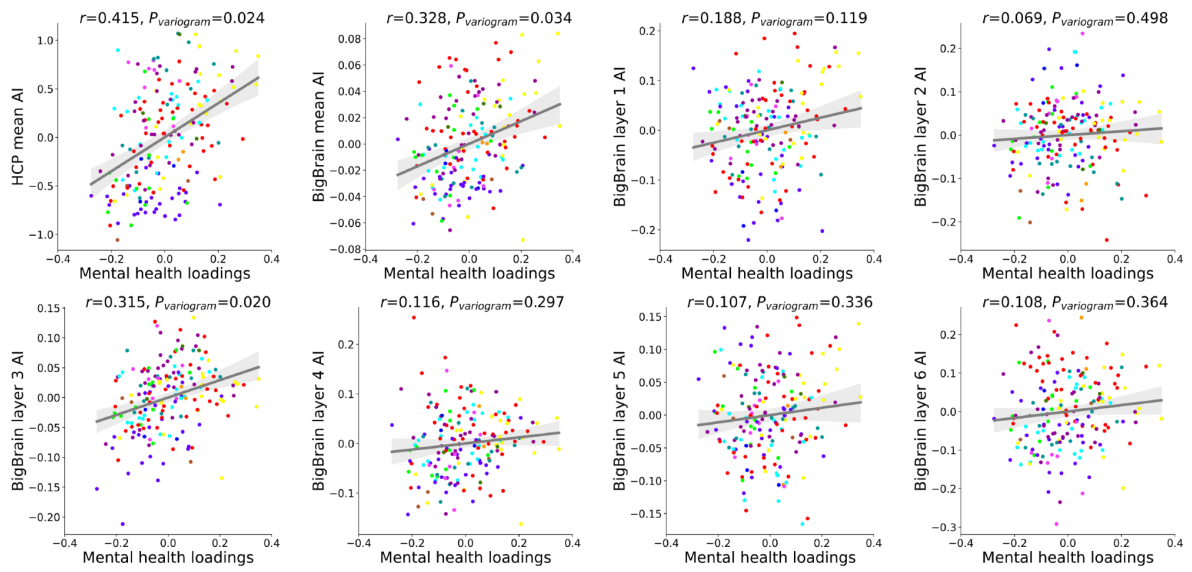

**Supplementary Figure S2.** Spatial correlation between CCA mental health brain loadings and AI maps (two-sided). Dots are 180 parcels.

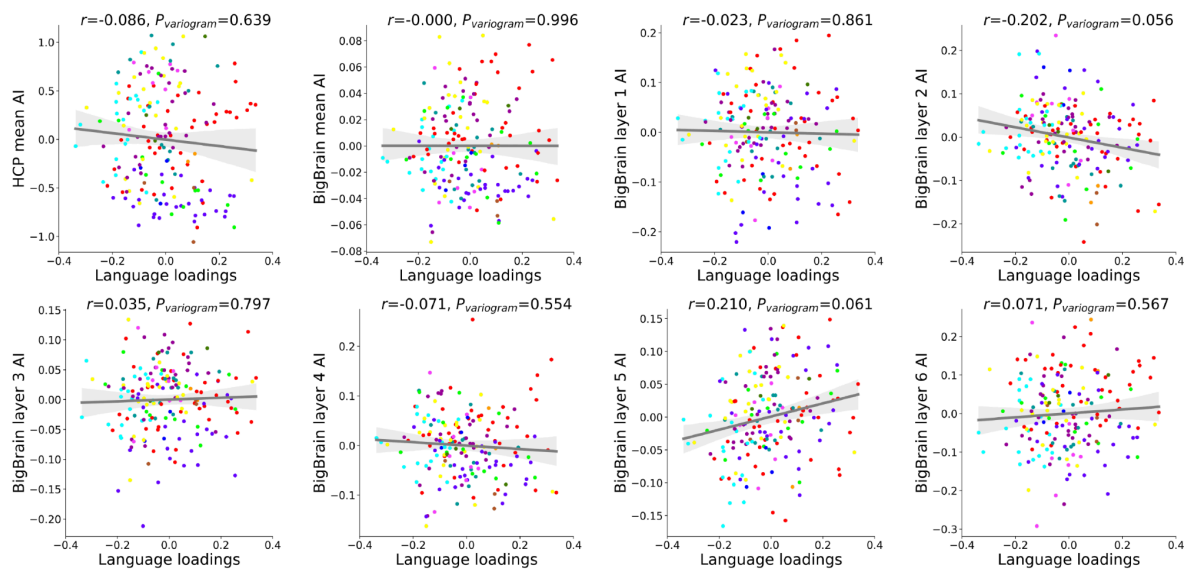

**Supplementary Figure S3.** Spatial correlation between CCA language brain loadings and AI maps (two-sided). Dots are 180 parcels.

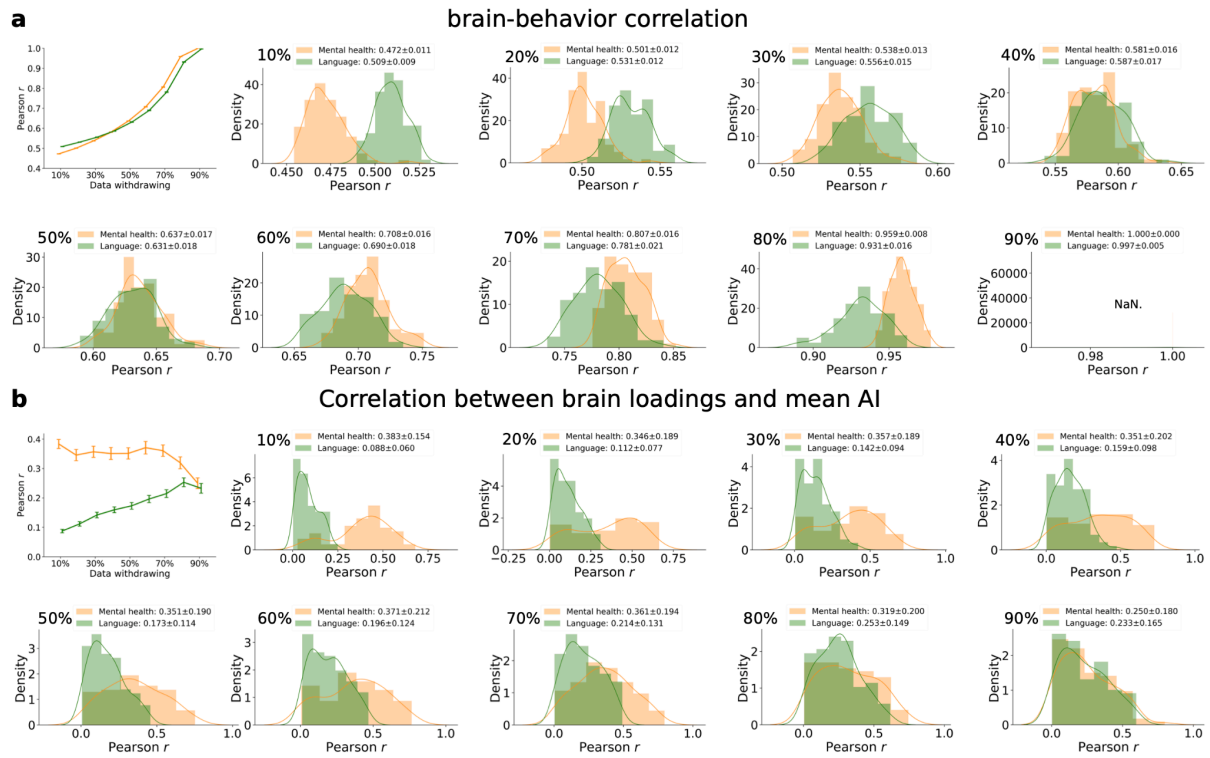

**Supplementary Figure S4.** Robustness test for CCA using resampling for 1000 times in HCP. **a.** Brain-Behavior correlation of the first latent dimension. **b.** Correlation between brain loadings and mean asymmetry index (AI) of HCP. Percentages are the data exclusion for resampling. Bars are standard errors.

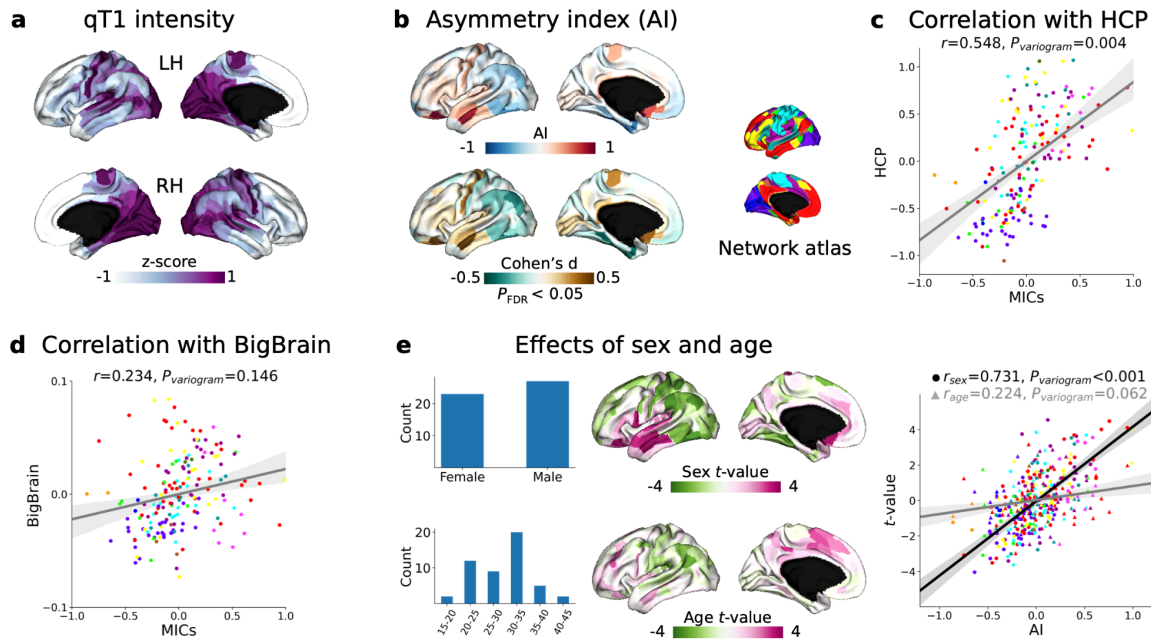

**Supplementary Figure S5.** Microstructural asymmetry in MICs ( $N = 50$ ). **a.** Z-score of quantitative T1 (qT1) intensity. **b.** Mean and Cohen's d asymmetry maps of individual intensity. **c.** Mean asymmetry map correlation between MICs qT1 and HCP T1w/T2w. **d.** Mean asymmetry map correlation between MICs qT1 and BigBrain cytoarchitecture. **e.** Effects of sex and age on the asymmetry index and correlation between sex/age effect and mean asymmetry index maps. Dots in the scatter charts are 180 parcels and colored by network atlas.

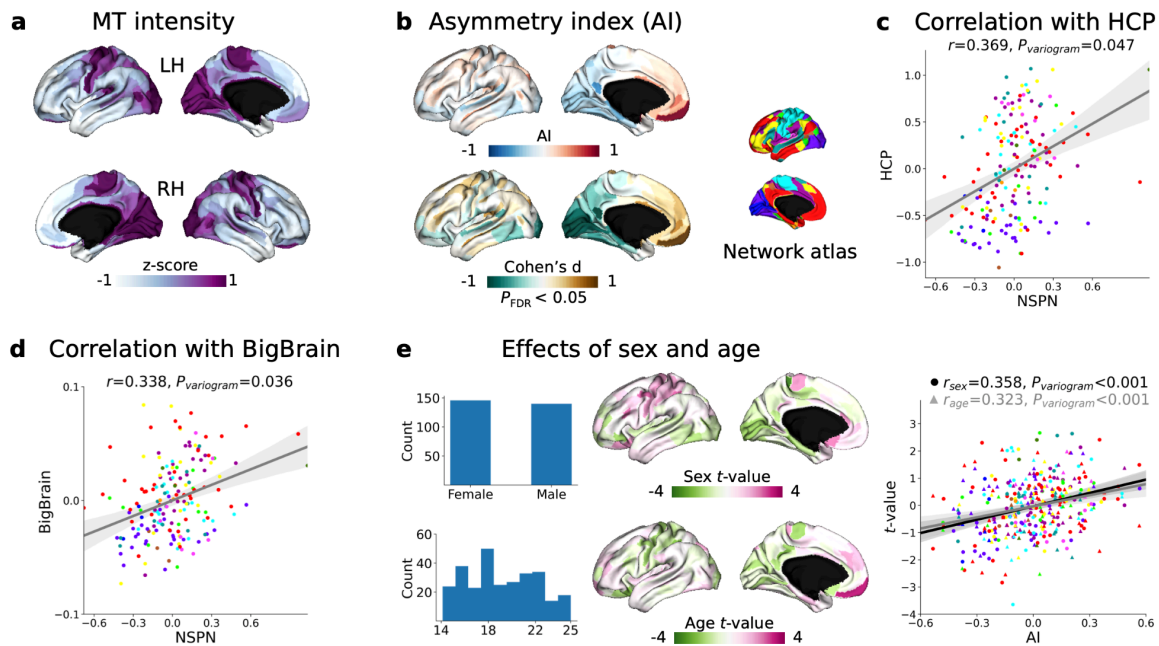

**Supplementary Figure S6.** Microstructural asymmetry in NSPN ( $N = 286$ ). **a.** Z-score of magnetization transfer (MT) intensity. **b.** Mean and Cohen's d asymmetry maps of individual intensity. **c.** Mean asymmetry map correlation between NSPN MT and HCP T1w/T2w. **d.** Mean asymmetry map correlation between NSPN MT and BigBrain cytoarchitecture. **e.** Effects of sex and age on the asymmetry index and correlation between sex/age effect and mean asymmetry index maps. Dots in the scatter charts are 180 parcels and colored by network atlas.

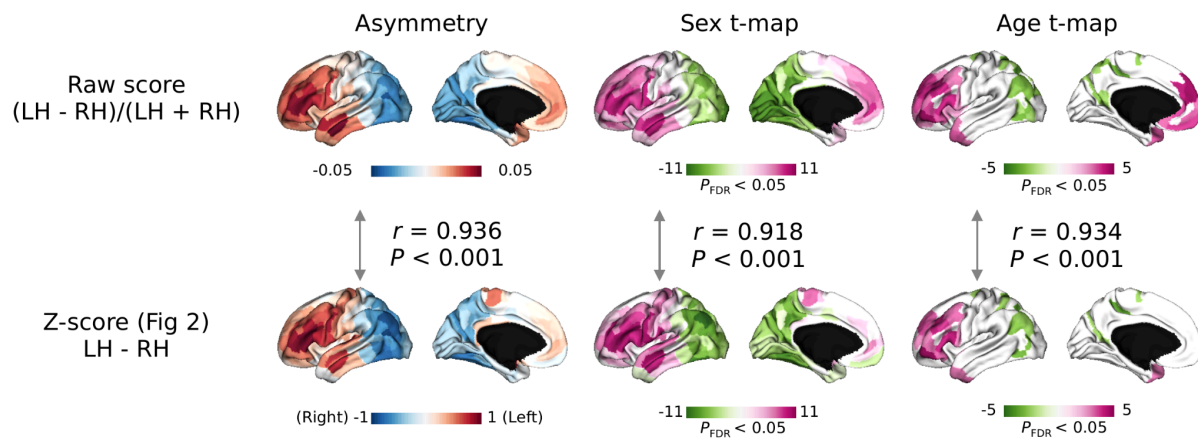

**Supplementary Figure S7.** Raw score versus z-score for asymmetry index ( $N = 1101$ ).



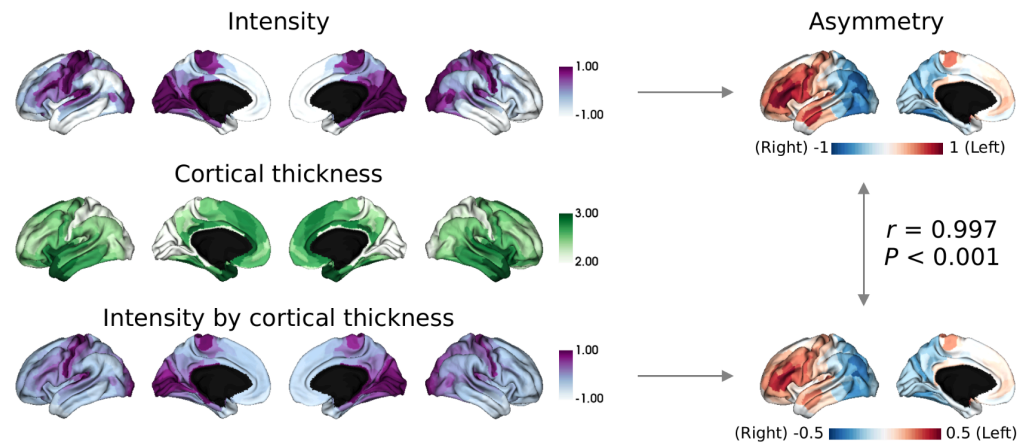

**Supplementary Figure S8.** Asymmetry of microstructural intensity by cortical thickness ( $N = 1101$ ).

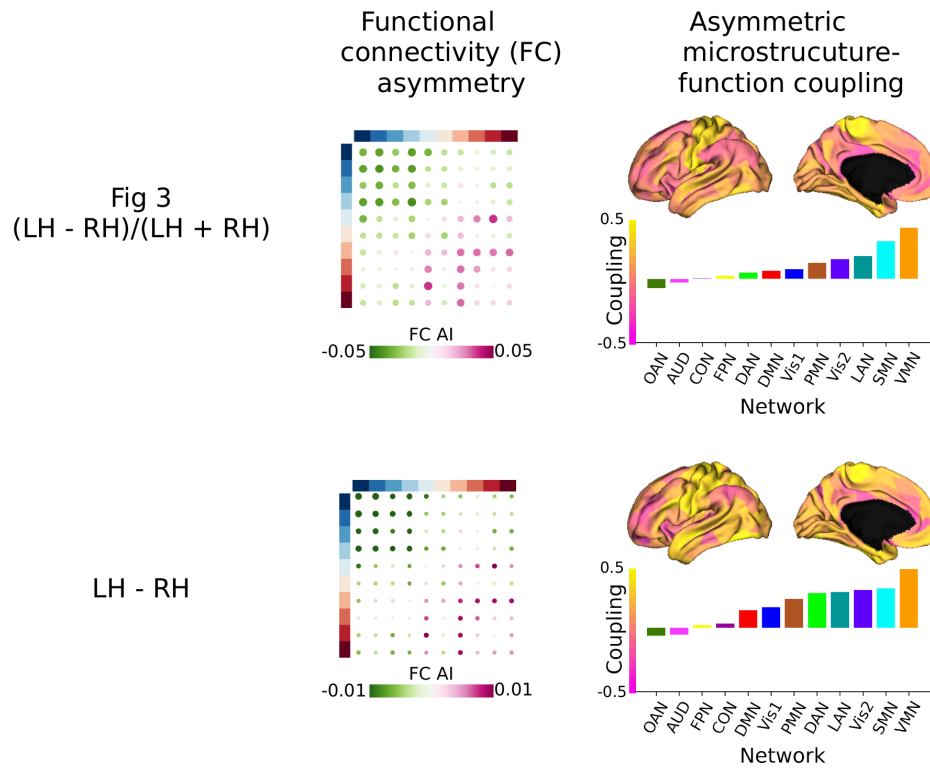

**Supplementary Figure S9.** Comparisons between original asymmetry (LH-RH)/(LH+RH) calculation and LH-RH for functional data ( $N = 1004$ ).

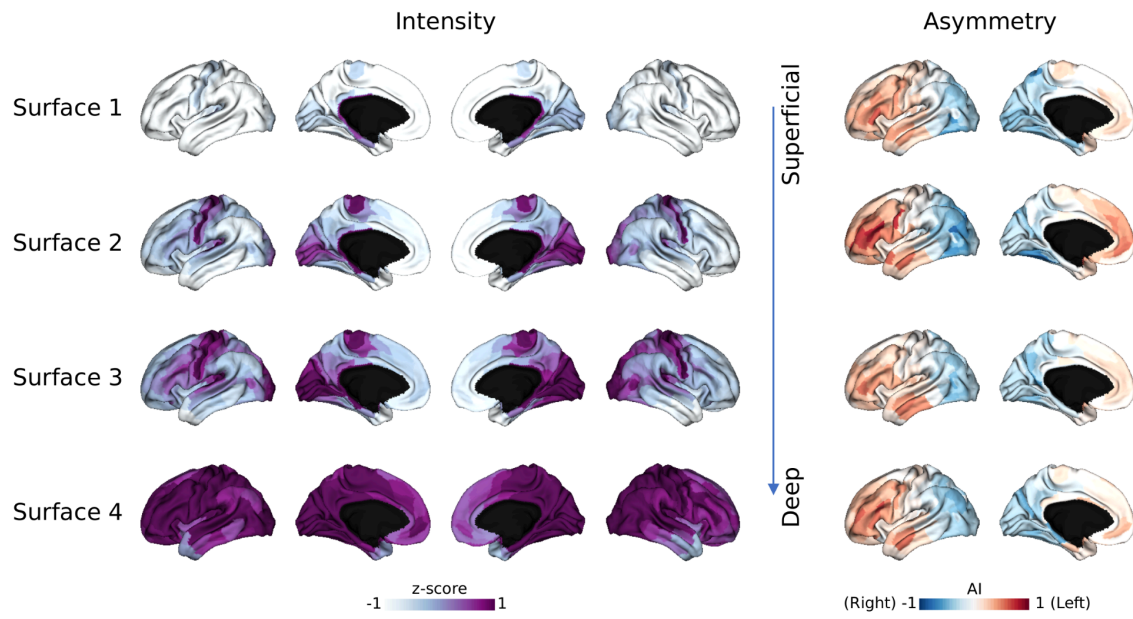

**Supplementary Figure S10.** T1w/T2w asymmetry across four equivolumetric surfaces ( $N=1101$ ).

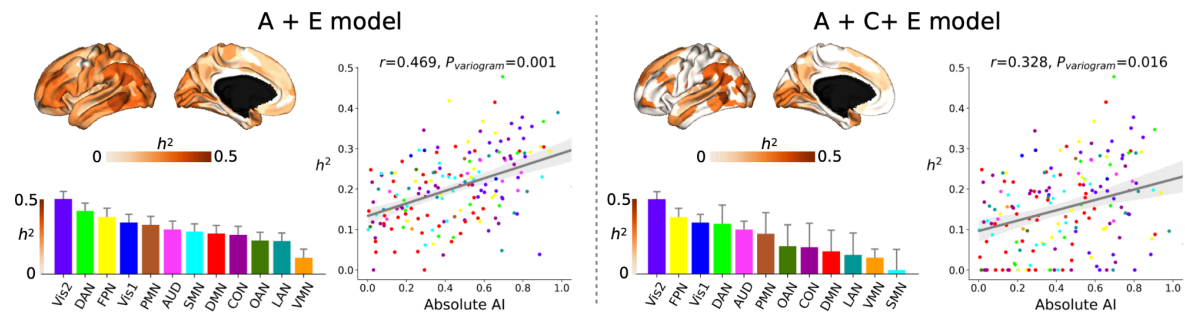

**Supplementary Figure S11.** T1w/T2w asymmetry heritability in HCP ( $N = 1101$ ): A + E versus A + C + E model. Dots are 180 parcels.
